# Supplementary material
Source: publisher figshare collection journal article supplement (https://tandf.figshare.com/ndownloader/files/22530143)
Supplement: Supplementary file 1 [file 22530143]

**Supplementary data**

**Figure 1.** HPLC chromatogram of standards for Fast Red E decolorization.


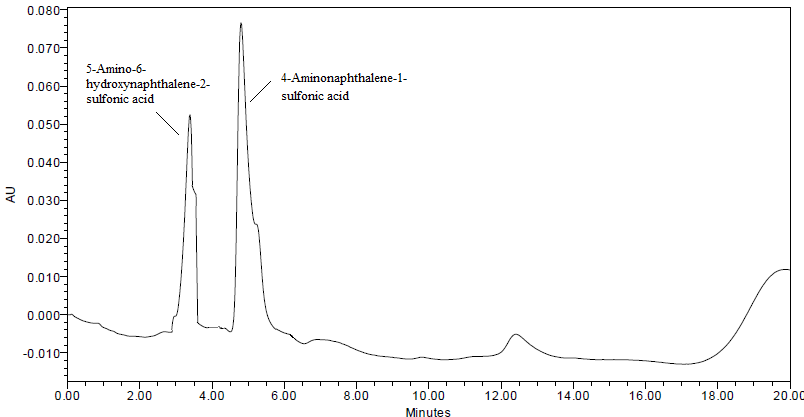


**Figure 1**
